# Supplementary material for: Waterlogging shifts ontogenic hormone dynamics in tomato leaves and petioles
Source: bioRxiv or medRxiv preprint supplement (doi:10.1101/2022.12.02.518842), 2022-12-03
Supplement: Supplementary file [file media-1.pdf]

# Waterlogging shifts ontogenic hormone dynamics in tomato leaves and petioles

Geldhof B.<sup>1</sup>, Novák O.<sup>2</sup>, Van de Poel B.<sup>1,3</sup>

<sup>1</sup> Molecular Plant Hormone Physiology Lab, Division of Crop Biotechnics, Department of Biosystems, KU Leuven, Willem de Croylaan 42, Leuven 3001, Belgium

<sup>2</sup> Laboratory of Growth Regulators, Centre of the Region Haná for Biotechnological and Agricultural Research, Institute of Experimental Botany, Czech Academy of Sciences, and Faculty of Science, Palacký University, CZ-783 71 Olomouc, Czech Republic

<sup>3</sup> KU Leuven Plant Institute (LPI), KU Leuven, Arenbergpark 30, 3001 Leuven, Belgium

## Supplemental material

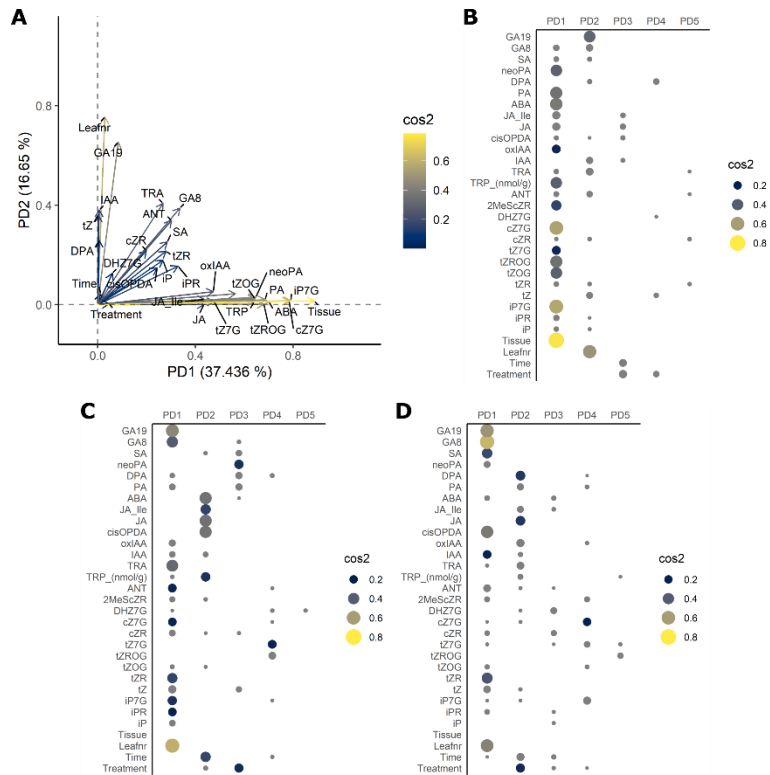

Supplemental Figure S1: Factor analysis of mixed data (FAMD) analysis of normalized hormone levels of tomato leaves and petioles during waterlogging. (A) Variable plot, including design variables and hormone variables. (B – D) Quality of representation of the variables on the FAMD principal dimensions (PD) in (B) leaves and petioles together, and (C) leaves and (D) petioles separately.
